# Supplementary material for: Improved stability of an engineered function using adapted bacterial strains
Source: bioRxiv or medRxiv preprint supplement (doi:10.1101/2020.03.05.979385), 2020-03-06
Supplement: Supplementary file [file media-1.pdf]

## Improved stability of an engineered function using adapted bacterial strains

**Supplementary Figure 1:** Maps of plasmids used in this study. (a) Plasmid pPRU encoded fluorescence function into *E. coli*. Plasmid pPRU contains the YFP coding DNA sequence (CDS) under control of the constitutive promoter  $P_{J23101}$ . The mRNA transcript from  $P_{J23101}$  is insulated with the riboJ insulator and terminated downstream of the YFP CDS with the transcriptional terminator  $T_{L3S2P21}$ . The plasmid contains the p15A origin of replication and the kanamycin resistance marker. (b) Plasmid pPRU-neg, used for competitive fitness assays, was constructed by inactivated the  $P_{J23101}$  promoter and corresponding RBS.

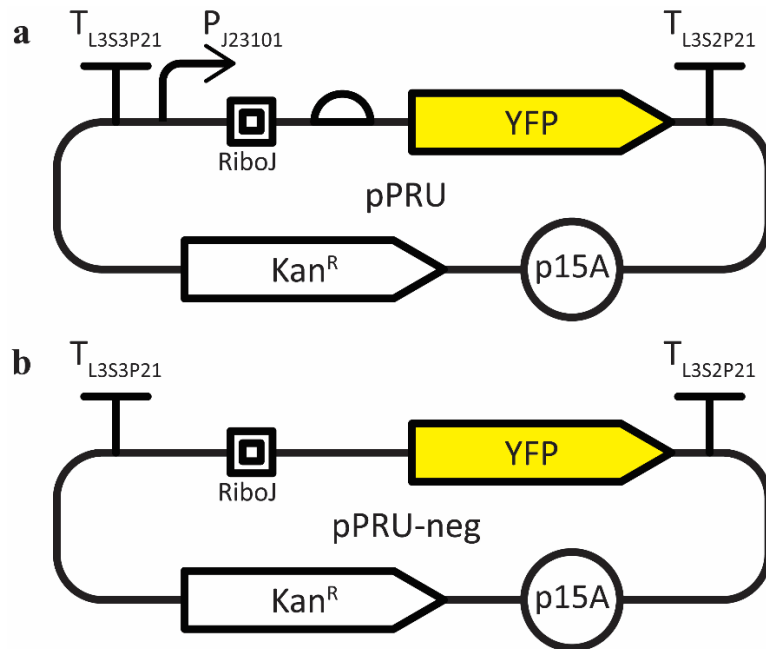

## Improved stability of an engineered function using adapted bacterial strains

**Supplementary Figure 2:** Growth curves of *E. coli* strains at generation 0 and generation 250 of stability assays. *E. coli* strains containing pRPU and grown in M9 media with kanamycin. Growth curves were measured from samples of each culture at generation 0 (gray curves) and generation 250 (black curves). Each biological replicate (A, B, C) was measured in technical triplicate. Some curves overlap.

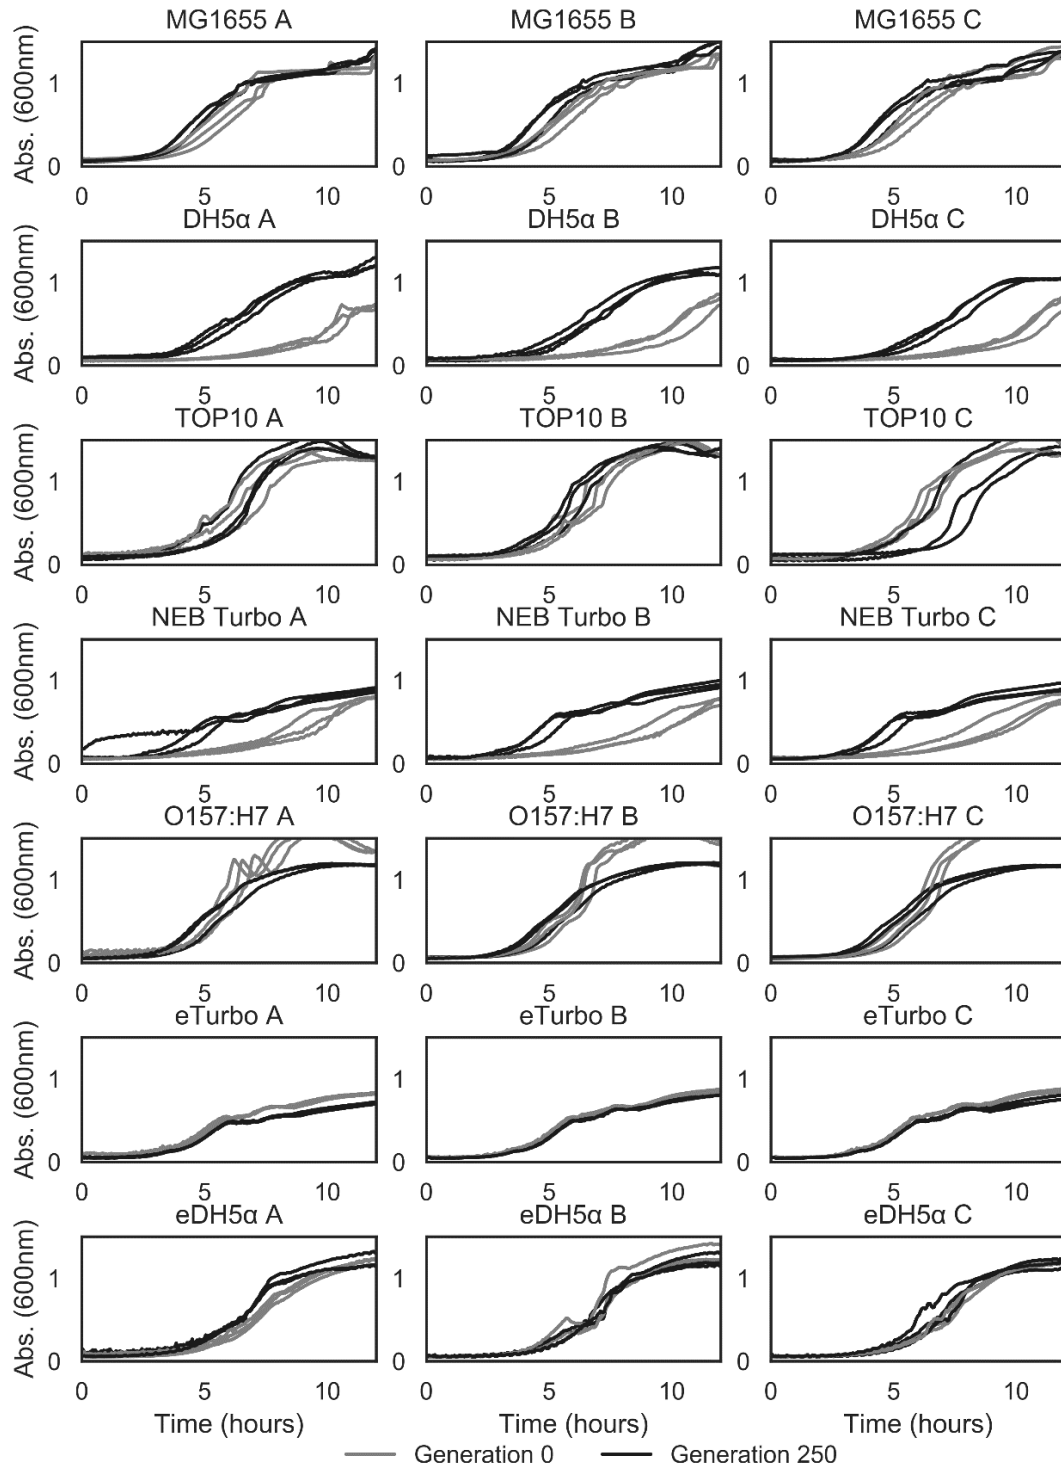

## Improved stability of an engineered function using adapted bacterial strains

**Supplementary Figure 3:** Growth curves of *E. coli* strains at generation 0 and generation 250 of competitive fitness assays. *E. coli* strains containing pRPU and grown in M9 media with kanamycin. Growth curves were measured from samples of each culture at generation 0 (gray curves) and generation 250 (black curves). Each biological replicate (A, B, C) was measured in technical triplicate. Some curves overlap.

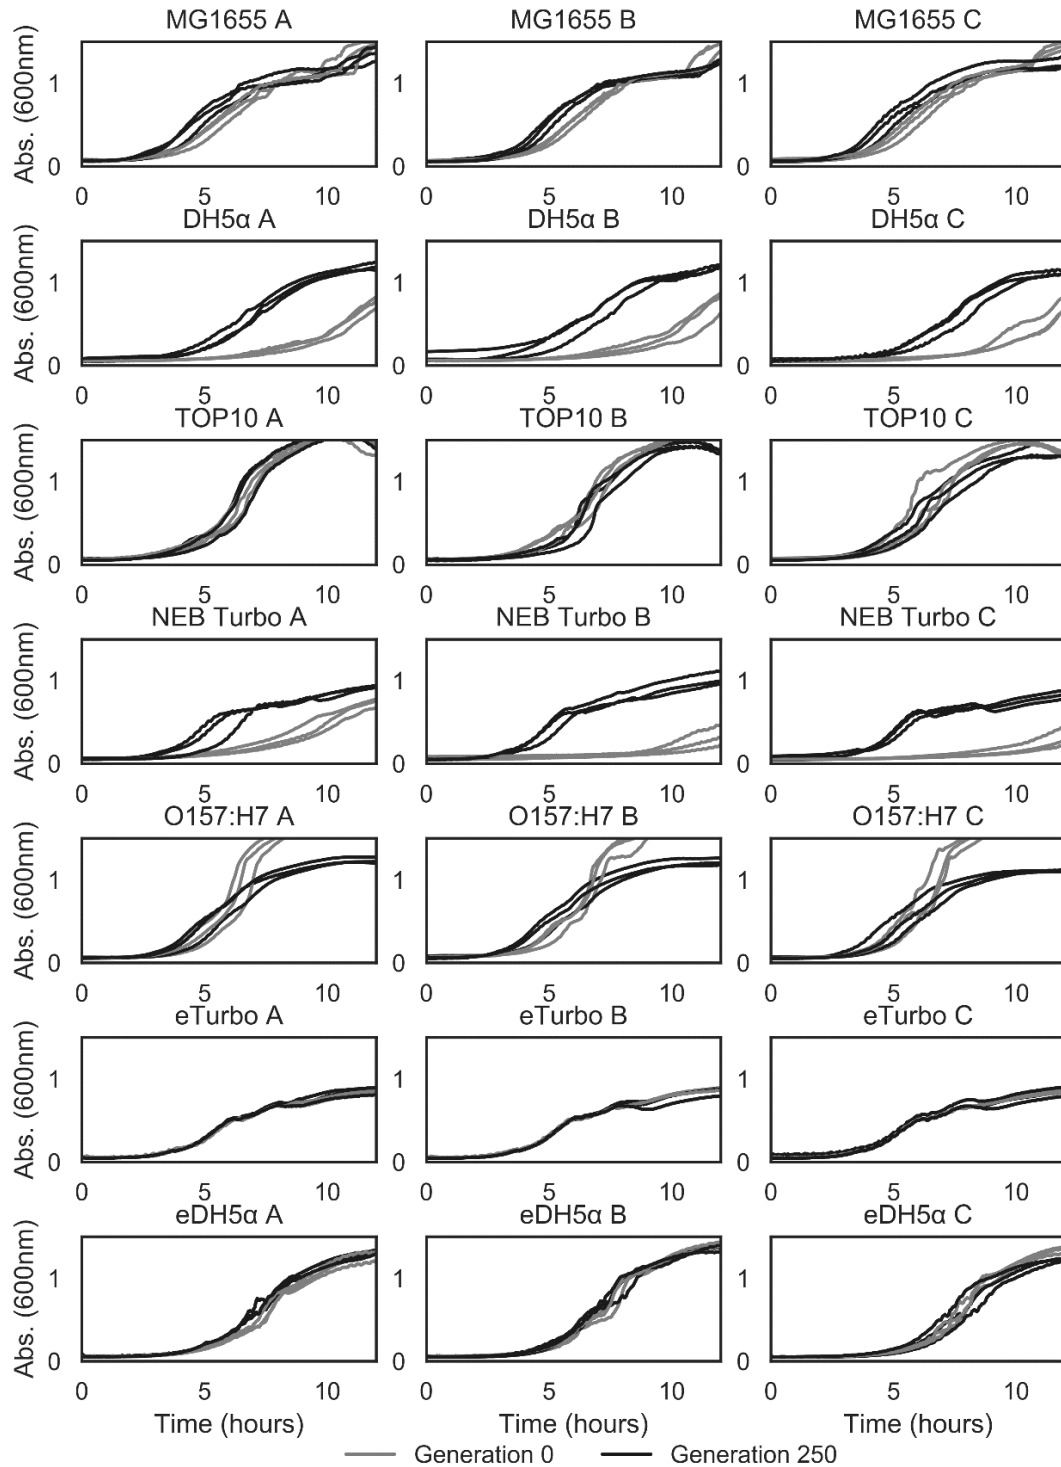

## Improved stability of an engineered function using adapted bacterial strains

**Supplementary Figure 4:** Growth curves show increased growth rates after adapting *E. coli* strains to M9 media. Growth curves of NEB Turbo (left column) and DH5 $\alpha$  (right column) before adaptation (gray curves) and after 100 generations of adaptation (black curves). Growth curves were measured in LB media (upper plots) and M9 media (lower plots). Measured in biological triplicate.

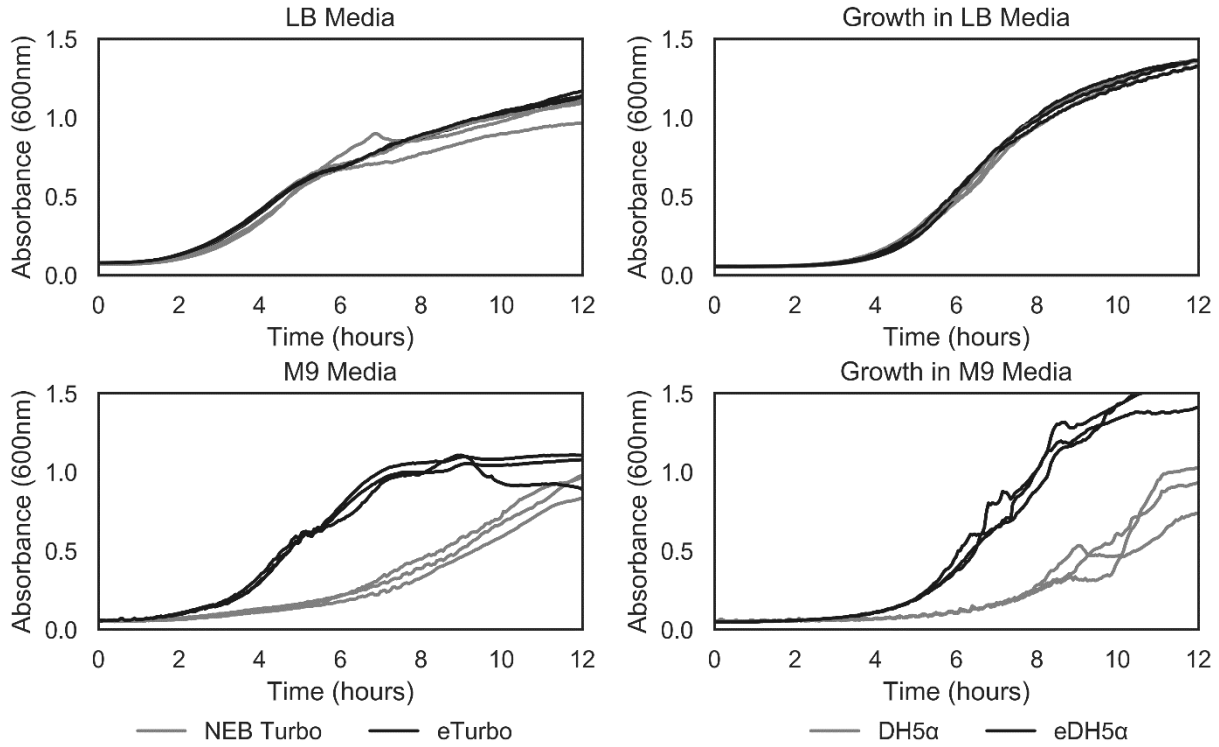

**Supplementary Figure 5:** Automated gating to isolate single cell event in flow cytometry. Cytometry data was gated by automating the subtraction of background events. Left, control blank sample to identify background events. Center, raw data from cytometer containing background and cell events. Right, gated results show cell events with background events removed.

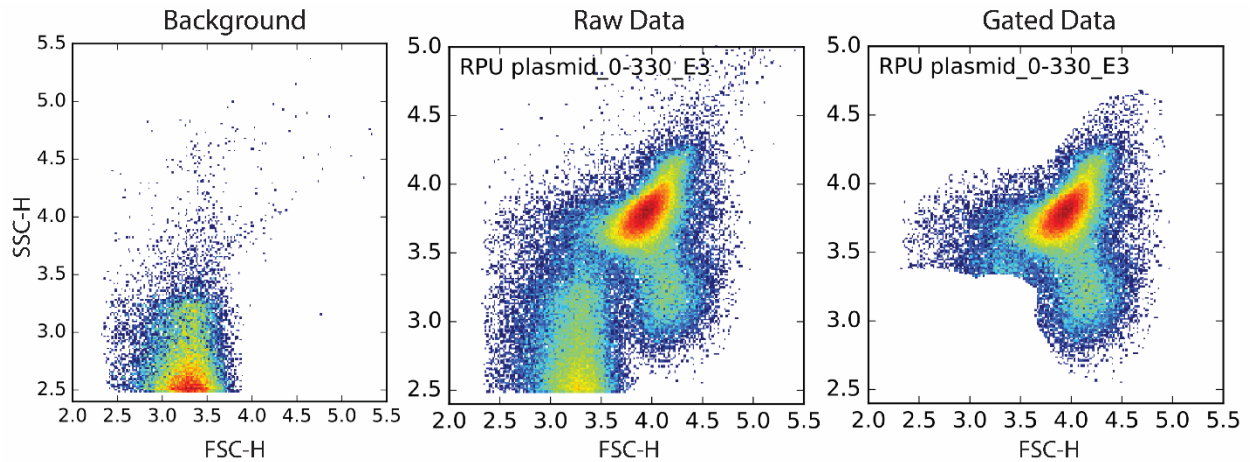

## Improved stability of an engineered function using adapted bacterial strains

**Supplementary table 1:** Variability (geometric standard deviation,  $\sigma_g$ ) of YFP expression from pRPU in different strains of *E. coli*.

| Strain        | Variability ( $\sigma_g$ ) |
|---------------|----------------------------|
| MG1655        | 1.14                       |
| O157:H7       | 1.20                       |
| TOP10         | 1.06                       |
| DH5 $\alpha$  | 1.34                       |
| eDH5 $\alpha$ | 1.16                       |
| NEB Turbo     | 1.12                       |
| eTurbo        | 1.08                       |

**Supplementary table 2:** Growth rate (as doublings per hour) with standard deviation of seven *E. coli* strains at generation 0 ( $\mu_0$ ) and generation 250 ( $\mu_{250}$ ) of the stability assays and competitive fitness assays.

|              | Stability Assay |             |       |           |           |             |       |           |
|--------------|-----------------|-------------|-------|-----------|-----------|-------------|-------|-----------|
|              | $\mu_0$         | $\mu_{250}$ | $N_0$ | $N_{250}$ | $\mu_0$   | $\mu_{250}$ | $N_0$ | $N_{250}$ |
| MG1655       | 1.36±0.08       | 1.65±0.11   | 9     | 8         | 1.26±0.14 | 1.52±0.17   | 8     | 9         |
| O157:H7      | 1.47±0.12       | 1.60±0.06   | 9     | 9         | 1.52±0.07 | 1.60±0.06   | 9     | 9         |
| TOP10        | 1.15±0.22       | 1.27±0.24   | 9     | 9         | 1.25±0.14 | 1.25±0.15   | 9     | 9         |
| DH5 $\alpha$ | 0.71±0.09       | 1.26±0.12   | 9     | 9         | 0.77±0.08 | 1.15±0.15   | 9     | 9         |
| eDH5         | 1.16±0.23       | 1.12±0.16   | 9     | 8         | 1.17±0.03 | 1.36±0.10   | 9     | 9         |
| NEB Turbo    | 0.65±0.06       | 1.26±0.08   | 9     | 8         | 0.63±0.07 | 1.25±0.08   | 9     | 9         |
| eTurbo       | 1.12±0.10       | 1.13±0.05   | 9     | 9         | 1.04±0.08 | 1.14±0.04   | 9     | 9         |

**Supplementary table 3:** Growth rate (as doublings per hour) with standard deviation of NEB Turbo and eTurbo in LB and M9 growth media. The change in growth rate ( $\Delta\mu$ ) calculated using  $\mu_{eTurbo}/\mu_{NEB Turbo}$ .

| Media | Growth Rate ( $hr^{-1}$ ) |           |             |
|-------|---------------------------|-----------|-------------|
|       | NEB Turbo                 | eTurbo    | $\Delta\mu$ |
| LB    | 1.87±0.19                 | 1.92±0.23 | 1.03±0.16   |
| M9    | 0.62±0.08                 | 1.01±0.16 | 1.63±0.34   |

**Supplementary Table 4:** Growth rate (as doublings per hour) with standard deviation of DH5 $\alpha$  and eDH5 $\alpha$  in LB and M9 growth media. The change in growth rate ( $\Delta\mu$ ) calculated using  $\mu_{eDH5\alpha}/\mu_{DH5\alpha}$ .

| Media | Growth Rate ( $hr^{-1}$ ) |               |             |
|-------|---------------------------|---------------|-------------|
|       | DH5 $\alpha$              | eDH5 $\alpha$ | $\Delta\mu$ |
| LB    | 1.63±0.07                 | 1.54±.04      | 0.94±0.05   |
| M9    | 0.70±0.11                 | 1.23±.10      | 1.75±0.31   |

## Improved stability of an engineered function using adapted bacterial strains

**Supplementary Table 5:** Minimum Information Standard for Engineered Organism Experiments (MIEO).

| <b>MIEO Category</b>  | <b>Factor</b>                    | <b>Level</b>                | <b>Supplier Part</b>        |
|-----------------------|----------------------------------|-----------------------------|-----------------------------|
| Media components (M9) | KH <sub>2</sub> PO <sub>4</sub>  | 3 g/L                       | BD (248510)                 |
|                       | Na <sub>2</sub> HPO <sub>4</sub> | 6.78 g/L                    | BD (248510)                 |
|                       | NaCl                             | 0.5 g/L                     | BD (248510)                 |
|                       | NH <sub>4</sub> Cl               | 1.0 g/L                     | BD (248510)                 |
|                       | D-glucose                        | 0.721 g/L                   | Sigma (G8270)               |
|                       | Casamino acids                   | 2 g/L                       | Calbiochem(2240)            |
|                       | CaCl <sub>2</sub>                | 0.011 g/L                   | Sigma (21115)               |
|                       | MgSO <sub>4</sub>                | 0.241 g/L                   | Sigma (83266)               |
|                       | Vitamin B1 (Thiamine)            | 3.40 x 10 <sup>-4</sup> g/L | Sigma-Aldrich (T4625)       |
|                       | Media properties                 | pH                          | 7.4                         |
|                       |                                  |                             |                             |
| LB-Miller             |                                  | 25g/L                       | Fisher BioReagents (BP1426) |
| Bacto-agar            |                                  | 15g/L`                      | BD (214010)                 |
| Container geometry    | Type                             | "Culture" tube              | Falcon (352059)             |
|                       | Container shape                  | Round                       |                             |
|                       | Container bottom                 | Round                       |                             |
|                       | Container volume                 | 14 mL                       |                             |
|                       | Fill volume                      | 3mL                         |                             |
|                       | Cover                            | Snap cap                    |                             |
|                       | Container shaking                | Shaking speed               | 200 rpm                     |
| Shaking diameter      |                                  | 2.5 cm                      |                             |
| Shaking mode          |                                  | Orbital                     |                             |
| Time                  | Growth time                      | 24h                         |                             |
| Environment           | Temperature                      | 37°C                        |                             |
|                       | Relative humidity                | Not measured                |                             |
| Selective Agents      | Antibiotic type                  | Kanamycin                   | gibco (11815-32)            |
|                       | Antibiotic concentration         | 50 ug/mL                    |                             |
| Inoculum              | Type                             | Single colony               |                             |
|                       | Concentration at inoculation     | N/A                         |                             |
|                       | Age of inoculum at inoculation   | N/A                         |                             |

## Improved stability of an engineered function using adapted bacterial strains

|                |                                |                  |                                 |
|----------------|--------------------------------|------------------|---------------------------------|
| Passage        | Volume of inoculum             | 3µL              |                                 |
|                | Age of inoculum at inoculation | 24 hours         |                                 |
|                | Concentration at inoculation   | 10 <sup>-3</sup> |                                 |
| Flow Cytometry | Device                         | Cytometer        |                                 |
|                | Device                         | Autosampler      |                                 |
|                | PBS                            |                  | Invitrogen (AM9625)             |
|                | Focusing Fluid                 |                  | Attune Focusing Fluid (4488621) |
|                | Calibration Beads              |                  | Spherotech (RCP-30-5A)          |
|                | Chloramphenicol                |                  | Sigma(C1919)                    |

### pRPU Plasmid Sequence:

L3S3P21 – red text

P<sub>l23101</sub> – green highlighted text

Riboj – gray highlighted text

RBS – green emboldened text

eYFP – yellow highlighted text

T<sub>L3S2P21</sub> – gray highlighted red text

P15A – cyan highlighted text

Kanamycin resistance – underlined text

>plasmid pRPU

```

CCAATTATTGAAGGCCTCCCTAACGGGGGGCCTTTTTTTGTTTCTGGTCTCCCCTTGATAAGT
CCCTAACTTTTACAGCTAGCTCAGTCCTAGGTATTATGCTAGCCTGAAGCTGTCACCGGATGTG
CTTTCCGGTCTGATGAGTCCGTGAGGACGAAACAGCCTCTACAAATAATTTTTGTTTAATACTAG
AGAAAGAGGGGAAATACTAGATGGTGAGCAAGGGCGAGGAGCTGTTACCGGGGTGGTGCCCAT
CCTGGTTCGAGCTGGACGGCGACGTAAACGGCCACAAGTTCAGCGTGTCCGGCGAGGGCGAGGGC
GATGCCACCTACGGCAAGCTGACCCTGAAGTTCATCTGCACCACAGGCAAGCTGCCCGTGCCCT
GGCCCACCCTCGTGACCACCTTCGGCTACGGCCTGCAATGCTTCGCCCGCTACCCCGACCACAT
GAAGCTGCACGACTTCTTCAAGTCCGCCATGCCCGAAGGCTACGTCCAGGAGCGCACCATCTTC
TTCAAGGACGACGGCAACTACAAGACCCGCGCCGAGGTGAAGTTCGAGGGCGACACCCTGGTGA
ACCGCATCGAGCTGAAGGGCATCGACTTCAAGGAGGACGGCAACATCCTGGGGCACAAGCTGGA
GTACAACACTACAACAGCCACAACGTCTATATCATGGCCGACAAGCAGAAGAACGGCATCAAGGTG
AACTTCAAGATCCGCCACAACATCGAGGACGGCAGCGTGCAGCTCGCCGACCACTACCAGCAGA
ACACCCCAATCGGCGACGGCCCCGTGCTGCTGCCCGACAACCACTACCTTAGCTACCAGTCCGC
CCTGAGCAAAGACCCCAACGAGAAGCGCGATCACATGGTCTGCTGGAGTTCGTGACCGCCGCC
GGGATCACTCTCGGCATGGACGAGCTGTACAAGTAACTCGGTACCAAATTCAGAAAAGAGGCC
TCCCGAAAGGGGGGCCTTTTTTCGTTTTGGTCCGATCCTCTACGCCGGACGCATCGTGGCCGGC
ATCACCGGCGCCACAGGTGCGGTTGCTGGCGCCTATATCGCCGACATCACCGATGGGGAAGATC

```

## Improved stability of an engineered function using adapted bacterial strains

GGGCTCGCCACTTCGGGCTCATGAGCAAATATTTTATCTGAGGTGCTTCCTCGCTCACTGACTC  
GCTGCACGAGGCA **GACCTCAGCGCTAGCGGAGTGTATACTGGCTTACTATGTTGGCACTGATGA**  
**GGGTGTCAGTGAAGTGCTTCATGTGGCAGGAGAAAAAGGCTGCACCGGTGCGTCAGCAGAATA**  
**TGTGATACAGGATATATTCGGCTTCCTCGCTCACTGACTCGCTACGCTCGGTGCTTCGACTGCG**  
**GCGAGCGGAAATGGCTTACGAACGGGGCGGAGATTTCTGGAAGATGCCAGGAAGATACTTAAC**  
**AGGGAAGTGAGAGGGCCGCGCAAAGCCGTTTTTCCATAGGCTCCGCCCCCTGACAAGCATCA**  
**CGAAATCTGACGCTCAAATCAGTGGTGGCGAAACCCGACAGGACTATAAAGATAACCAGGCGTTT**  
**CCCCCTGGCGGCTCCCTCGTGCGCTCTCCTGTTCTCCTGCCTTTTCGGTTTACCGGTGTCATTCCGC**  
**TGTTATGGCCGCGTTTGTCTCATTCCACGCCTGACACTCAGTTCGGGTAGGCAGTTCGCTCCA**  
**AGCTGGACTGTATGCACGAACCCCCGTTTCAGTCCGACCGCTGCGCCTTATCCGGTAACTATCG**  
**TCTTGAGTCCAACCCGAAAGACATGCAAAGCACCCTGGCAGCAGCCACTGGTAATTGATTT**  
**AGAGGAGTTAGTCTTGAAGTCATGCGCCGGTTAAGGCTAAACTGAAAGGACAAGTTTTGGTGAC**  
**TGCGCTCCTCCAAGCCAGTTACCTCGGTTCAAAGAGTTGGTAGCTCAGAGAACCCTCGAAAAAC**  
**CGCCCTGCAAGGCGGTTTTTTTCGTTTTTCAGAGCAAGAGATTACGCGCAGACCAAACGATCTCA**  
**AGAAGATCATCTTATTAA**GGGGTCTGACGCTCAGTGGAACGAAAAATCAATCTAAAGTATATAT  
GAGTAAACTTGGTCTGACAGTTACCTTAGAAAACTCATCGAGCATCAAATGAAACTGCAATTT  
ATTCATATCAGGATTATCAATACCATATTTTTGAAAAAGCCGTTTCTGTAATGAAGGAGAAAAAC  
TCACCGAGGCAGTTCATAGGATGGCAAGATCCTGGTATCGGTCTGCGATTCCGACTCGTCCAA  
CATCAATACAACCTATTAATTTCCCCTCGTCAAAAATAAGGTTATCAAGTGAGAAATCACCATG  
AGTGACGACTGAATCCGGTGAGAATGGCAAAGCTTATGCATTTCTTTCCAGACTTGTTCAACA  
GGCCAGCCATTACGCTCGTCATCAAAATCACTCGCATCAACCAAACCGTTATTCATTCGTGATT  
GCGCCTGAGCGAGACGAAATACGCGATCGCTGTTAAAAGGACAATTACAAACAGGAATCGAATG  
CAACCGGCGCAGGAACACTGCCAGCGCATCAACAATATTTTACCTGAATCAGGATATTTCTTCT  
AATACCTGGAATGCTGTTTTCCCGGGGATCGCAGTGGTGAGTAACCATGCATCATCAGGAGTAC  
GGATAAAATGCTTGATGGTCCGAAGAGGCATAAATTCCGTCAGCCAGTTTAGTCTGACCATCTC  
ATCTGTAACATCATTGGCAACGCTACCTTTGCCATGTTTCAGAAACAACCTCTGGCGCATCGGGC  
TTCCATACAATCGATAGATTGTCGCACCTGATTGCCCGACATTATCGCGAGCCATTTATACC  
CATATAAATCAGCATCCATGTTGGAATTTAATCGCGGCCTGGAGCAAGACGTTTCCCGTTGAAT  
ATGGCTCATAACCCCCCTTGTAATTAATGTTTATGTAAGCAGACAGTTTTTATTGTTTCATGATGAT  
ATATTTTTATCTTGTGCAATGTACATCAGAGATTTTGAGACACAA
